# Supplementary material
Source: PubMed Central journal article supplement (PMC5118597)
Supplement: thnov06p2314s1.pdf [file thnov06p2314s1.pdf]

## Supplementary Information

### Near infrared fluorescent nanoparticles derived from hyaluronic acid improve tumor contrast for image-guided surgery

*Tanner K. Hill<sup>1</sup>, Sneha S. Kelkar<sup>2</sup>, Nicholas E. Wojtynek<sup>3</sup>, Joshua J. Soucek<sup>1</sup>, William M. Payne<sup>1</sup>, Kristina Stumpf<sup>4</sup>, Frank C. Marini<sup>4,5</sup>, Aaron M. Mohs<sup>\*1,3</sup>*

1. Department of Pharmaceutical Sciences, University of Nebraska Medical Center, Omaha, NE 68198, United States
2. Department of Plastic and Reconstructive Surgery, Wake Forest University Health Sciences, Winston-Salem, NC 27157, United States
3. Fred and Pamela Buffett Cancer Center, University of Nebraska Medical Center, Omaha, NE 68198, United States
4. Wake Forest Institute for Regenerative Medicine, Wake Forest University Health Sciences, Winston-Salem, NC 27157, United States
5. Department of Cancer Biology, Wake Forest University Health Sciences, Winston-Salem, NC 27157, United States

#### Supplementary Methods

##### *Dye Release*

Release of ICG and Cy7.5 from their respective HA NP formulations (lead NPs based on contrast enhancement studies) was determined in release media, which is constituted from BSA dissolved in PBS to 42.5 mg/ml BSA. NanoICG<sub>PBA</sub>, ICG, NanoCy7.5<sub>100-H</sub>, or Cy7.5, were dissolved in release media to 20  $\mu$ M, 20  $\mu$ M, 13.8  $\mu$ M, and 20  $\mu$ M, respectively, based on dye content. Release of free ICG and Cy7.5 from NPs relative to dye alone was examined via dialysis. Solutions containing NP dye formulation or dye alone (1 ml) was placed in 100 kDa MWCO dialysis tubing and immersed in 10 mL of release media in 15 ml conical tubes, sealed, and placed on a rocker. Dye released into release media was measured at 5, 10, 20, and 30 min and 1, 2, 4, 6, 24, 48, and 72 h by taking 600  $\mu$ l from the conical tube and absorbance spectra were obtained with a 220 UV-Vis Spectrophotometer (Thermo Scientific). Release media was subtracted using Thermo

INSIGHT software. After spectra acquisition the sample was returned to the tube. Release of dye from NP was and transport of free dye was measured as appearance of dye in the release media outside the dialysis tubing. For ICG and NanoICG<sub>PBA</sub>, this was measured as  $\Delta\text{abs}_{799} = \text{abs}_{799}$  aliquot –  $\text{abs}_{799}$  release media, while for Cy7.5 and NanoCy7.5,  $\Delta\text{abs}_{804} = \text{abs}_{804}$  aliquot –  $\text{abs}_{804}$  release media.

## Supplementary Results

### *Dye Release*

The release of Cy7.5 or ICG from NP formulations was compared to the respective dye alone. Albumin was required both inside and outside the bag due to the poor solubility the NIR dyes. The presence of serum albumin also more accurately reflects the conditions that the NPs developed in the work interact with upon systemic administration. Supplemental Figure 1 shows that both free Cy7.5 and ICG had rapid transport across the dialysis membrane via albumin with the majority of peak dye concentration occurring within the first 6 hours. HA-Cy7.5 conjugate more slowly released compared to Cy7.5, which is likely due to direct chemical conjugation of Cy7.5 to HA. ICG that as physically entrapped in HA-based NPs rapidly released into albumin. It is not likely that NanoICG diffused across the membrane. We have previously reported that ICG entrapped in HA NPs has broad scattering due to close packing [26]. The ICG spectra collected from the conical tubes is consistent with albumin bound ICG [36].

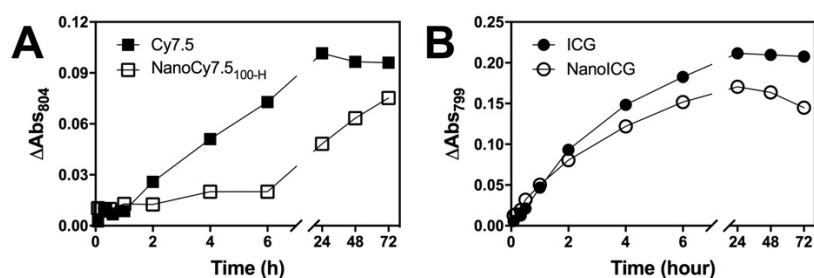

**Supplemental Figure 1.** Release of Cy7.5 and ICG from NP formulations. (A) NanoCy7.5<sub>100-H</sub> (open squares) and Cy7.5 (filled squares). (B) NanoICG<sub>PBA</sub> (open circles) and ICG (filled circles).



|                                                    |       |       |      |      |      |      |       |       |      |
|----------------------------------------------------|-------|-------|------|------|------|------|-------|-------|------|
| Tumor                                              |       |       |      |      |      |      |       |       |      |
| ICG vs. NanoICG <sub>PBA</sub>                     | 34.9  | 18.29 | ns   | 6.95 | 15.9 | **** | 4.624 | 14.43 | **** |
| ICG vs. NanoICG <sub>5bCA</sub>                    | 34.9  | 16.1  | ns   | 6.95 | 14.2 | **** | 4.624 | 9.167 | ***  |
| NanoICG <sub>PBA</sub> vs. NanoICG <sub>5bCA</sub> | 18.29 | 16.1  | ns   | 15.9 | 14.2 | ns   | 14.43 | 9.167 | **** |
| Muscle                                             |       |       |      |      |      |      |       |       |      |
| ICG vs. NanoICG <sub>PBA</sub>                     | 22.1  | 4.984 | ns   | 2.13 | 2.13 | ns   | 0.653 | 1.628 | ns   |
| ICG vs. NanoICG <sub>5bCA</sub>                    | 22.1  | 10.6  | ns   | 2.13 | 2.78 | ns   | 0.653 | 1.711 | ns   |
| NanoICG <sub>PBA</sub> vs. NanoICG <sub>5bCA</sub> | 4.984 | 10.6  | ns   | 2.13 | 2.78 | ns   | 1.628 | 1.711 | ns   |
| Lung                                               |       |       |      |      |      |      |       |       |      |
| ICG vs. NanoICG <sub>PBA</sub>                     | 43    | 23.18 | ns   | 10.3 | 9.41 | ns   | 2.281 | 7.017 | *    |
| ICG vs. NanoICG <sub>5bCA</sub>                    | 43    | 23.3  | ns   | 10.3 | 9.77 | ns   | 2.281 | 7.202 | **   |
| NanoICG <sub>PBA</sub> vs. NanoICG <sub>5bCA</sub> | 23.18 | 23.3  | ns   | 9.41 | 9.77 | ns   | 7.017 | 7.202 | ns   |
| Heart                                              |       |       |      |      |      |      |       |       |      |
| ICG vs. NanoICG <sub>PBA</sub>                     | 18.8  | 13.67 | ns   | 3.65 | 5.04 | ns   | 1.518 | 3.958 | ns   |
| ICG vs. NanoICG <sub>5bCA</sub>                    | 18.8  | 9.73  | ns   | 3.65 | 7.19 | ns   | 1.518 | 4.1   | ns   |
| NanoICG <sub>PBA</sub> vs. NanoICG <sub>5bCA</sub> | 13.67 | 9.73  | ns   | 5.04 | 7.19 | ns   | 3.958 | 4.1   | ns   |
| Bone                                               |       |       |      |      |      |      |       |       |      |
| ICG vs. NanoICG <sub>PBA</sub>                     | 18.9  | 15.07 | ns   | 7.23 | 10   | ns   | 3.393 | 7.547 | *    |
| ICG vs. NanoICG <sub>5bCA</sub>                    | 18.9  | 12.7  | ns   | 7.23 | 9.52 | ns   | 3.393 | 8.472 | **   |
| NanoICG <sub>PBA</sub> vs. NanoICG <sub>5bCA</sub> | 15.07 | 12.7  | ns   | 10   | 9.52 | ns   | 7.547 | 8.472 | ns   |
| Kidney                                             |       |       |      |      |      |      |       |       |      |
| ICG vs. NanoICG <sub>PBA</sub>                     | 177   | 54.55 | **** | 21.4 | 23.3 | ns   | 10.11 | 30.36 | **** |
| ICG vs. NanoICG <sub>5bCA</sub>                    | 177   | 74.2  | **** | 21.4 | 20.8 | ns   | 10.11 | 30.48 | **** |
| NanoICG <sub>PBA</sub> vs. NanoICG <sub>5bCA</sub> | 54.55 | 74.2  | ns   | 23.3 | 20.8 | ns   | 30.36 | 30.48 | ns   |
| Pancreas                                           |       |       |      |      |      |      |       |       |      |
| ICG vs. NanoICG <sub>PBA</sub>                     | 49    | 20.71 | ns   | 7.63 | 7.98 | ns   | 1.945 | 5.846 | *    |
| ICG vs. NanoICG <sub>5bCA</sub>                    | 49    | 35.4  | ns   | 7.63 | 7.58 | ns   | 1.945 | 6.33  | *    |
| NanoICG <sub>PBA</sub> vs. NanoICG <sub>5bCA</sub> | 20.71 | 35.4  | ns   | 7.98 | 7.58 | ns   | 5.846 | 6.33  | ns   |

|                                                    |       |       |    |      |      |      |       |       |      |
|----------------------------------------------------|-------|-------|----|------|------|------|-------|-------|------|
| Liver                                              |       |       |    |      |      |      |       |       |      |
| ICG vs. NanoICG <sub>PBA</sub>                     | 95    | 100.3 | ns | 21.2 | 53.2 | **** | 7.405 | 32.13 | **** |
| ICG vs. NanoICG <sub>5bCA</sub>                    | 95    | 73.7  | ns | 21.2 | 40.4 | **** | 7.405 | 37.08 | **** |
| NanoICG <sub>PBA</sub> vs. NanoICG <sub>5bCA</sub> | 100.3 | 73.7  | ns | 53.2 | 40.4 | **** | 32.13 | 37.08 | **   |
| Spleen                                             |       |       |    |      |      |      |       |       |      |
| ICG vs. NanoICG <sub>PBA</sub>                     | 28.8  | 19.75 | ns | 9.14 | 16.3 | **   | 3.643 | 15.71 | **** |
| ICG vs. NanoICG <sub>5bCA</sub>                    | 28.8  | 17.7  | ns | 9.14 | 14   | ns   | 3.643 | 17.19 | **** |
| NanoICG <sub>PBA</sub> vs. NanoICG <sub>5bCA</sub> | 19.75 | 17.7  | ns | 16.3 | 14   | ns   | 15.71 | 17.19 | ns   |

| NanoCy7.5 <sub>10</sub>                                 | 4 h   |       |      | 24 h  |       |      | 72 h  |       |      |
|---------------------------------------------------------|-------|-------|------|-------|-------|------|-------|-------|------|
|                                                         | Y1    | Y2    | Sig. | Y1    | Y2    | Sig. | Y1    | Y2    | Sig. |
| Tumor                                                   |       |       |      |       |       |      |       |       |      |
| Cy7.5 vs. NanoCy7.5 <sub>10-Ø</sub>                     | 11.81 | 51.23 | ns   | 13.55 | 55.71 | ns   | 21.88 | 42.77 | ns   |
| Cy7.5 vs. NanoCy7.5 <sub>10-L</sub>                     | 11.81 | 24.28 | ns   | 13.55 | 45.44 | ns   | 21.88 | 109.3 | ***  |
| Cy7.5 vs. NanoCy7.5 <sub>10-H</sub>                     | 11.81 | 68.25 | ns   | 13.55 | 70.08 | ns   | 21.88 | 72.36 | ns   |
| NanoCy7.5 <sub>10-Ø</sub> vs. NanoCy7.5 <sub>10-L</sub> | 51.23 | 24.28 | ns   | 55.71 | 45.44 | ns   | 42.77 | 109.3 | *    |
| NanoCy7.5 <sub>10-Ø</sub> vs. NanoCy7.5 <sub>10-H</sub> | 51.23 | 68.25 | ns   | 55.71 | 70.08 | ns   | 42.77 | 72.36 | ns   |
| NanoCy7.5 <sub>10-L</sub> vs. NanoCy7.5 <sub>10-H</sub> | 24.28 | 68.25 | ns   | 45.44 | 70.08 | ns   | 109.3 | 72.36 | ns   |
| Muscle                                                  |       |       |      |       |       |      |       |       |      |
| Cy7.5 vs. NanoCy7.5 <sub>10-Ø</sub>                     | 23.8  | 29.63 | ns   | 12.18 | 16.85 | ns   | 18.89 | 9.338 | ns   |
| Cy7.5 vs. NanoCy7.5 <sub>10-L</sub>                     | 23.8  | 29.78 | ns   | 12.18 | 29.45 | ns   | 18.89 | 15.77 | ns   |
| Cy7.5 vs. NanoCy7.5 <sub>10-H</sub>                     | 23.8  | 45    | ns   | 12.18 | 33.11 | ns   | 18.89 | 15.7  | ns   |
| NanoCy7.5 <sub>10-Ø</sub> vs. NanoCy7.5 <sub>10-L</sub> | 29.63 | 29.78 | ns   | 16.85 | 29.45 | ns   | 9.338 | 15.77 | ns   |
| NanoCy7.5 <sub>10-Ø</sub> vs. NanoCy7.5 <sub>10-H</sub> | 29.63 | 45    | ns   | 16.85 | 33.11 | ns   | 9.338 | 15.7  | ns   |
| NanoCy7.5 <sub>10-L</sub> vs. NanoCy7.5 <sub>10-H</sub> | 29.78 | 45    | ns   | 29.45 | 33.11 | ns   | 15.77 | 15.7  | ns   |
| Lung                                                    |       |       |      |       |       |      |       |       |      |
| Cy7.5 vs. NanoCy7.5 <sub>10-Ø</sub>                     | 112.6 | 251.8 | *    | 67.21 | 52.78 | ns   | 68.06 | 30.71 | ns   |
| Cy7.5 vs. NanoCy7.5 <sub>10-L</sub>                     | 112.6 | 202.2 | ns   | 67.21 | 85.96 | ns   | 68.06 | 70.83 | ns   |
| Cy7.5 vs. NanoCy7.5 <sub>10-H</sub>                     | 112.6 | 325.5 | ***  | 67.21 | 95.18 | ns   | 68.06 | 64.26 | ns   |
| NanoCy7.5 <sub>10-Ø</sub> vs. NanoCy7.5 <sub>10-L</sub> | 251.8 | 202.2 | ns   | 52.78 | 85.96 | ns   | 30.71 | 70.83 | ns   |



|                                                        |     |       |       |      |       |       |      |       |       |      |
|--------------------------------------------------------|-----|-------|-------|------|-------|-------|------|-------|-------|------|
| NanoCy7.5 <sub>10-∅</sub><br>NanoCy7.5 <sub>10-H</sub> | vs. | 130.5 | 175   | ns   | 44.38 | 76.58 | ns   | 48.8  | 66.64 | ns   |
| NanoCy7.5 <sub>10-L</sub><br>NanoCy7.5 <sub>10-H</sub> | vs. | 95.09 | 175   | ns   | 72.75 | 76.58 | ns   | 80.88 | 66.64 | ns   |
| Liver                                                  |     |       |       |      |       |       |      |       |       |      |
| Cy7.5 vs. NanoCy7.5 <sub>10-∅</sub>                    |     | 1432  | 1128  | **** | 834.6 | 1270  | **** | 474.5 | 865.2 | **** |
| Cy7.5 vs. NanoCy7.5 <sub>10-L</sub>                    |     | 1432  | 1602  | **   | 834.6 | 1217  | **** | 474.5 | 1264  | **** |
| Cy7.5 vs. NanoCy7.5 <sub>10-H</sub>                    |     | 1432  | 1715  | **** | 834.6 | 1468  | **** | 474.5 | 1098  | **** |
| NanoCy7.5 <sub>10-∅</sub><br>NanoCy7.5 <sub>10-L</sub> | vs. | 1128  | 1602  | **** | 1270  | 1217  | ns   | 865.2 | 1264  | **** |
| NanoCy7.5 <sub>10-∅</sub><br>NanoCy7.5 <sub>10-H</sub> | vs. | 1128  | 1715  | **** | 1270  | 1468  | ***  | 865.2 | 1098  | **** |
| NanoCy7.5 <sub>10-L</sub><br>NanoCy7.5 <sub>10-H</sub> | vs. | 1602  | 1715  | ns   | 1217  | 1468  | **** | 1264  | 1098  | **** |
| Spleen                                                 |     |       |       |      |       |       |      |       |       |      |
| Cy7.5 vs. NanoCy7.5 <sub>10-∅</sub>                    |     | 96.33 | 225.6 | ns   | 78.27 | 314   | **** | 46.76 | 138   | **   |
| Cy7.5 vs. NanoCy7.5 <sub>10-L</sub>                    |     | 96.33 | 138.7 | ns   | 78.27 | 149.8 | ns   | 46.76 | 243.4 | **** |
| Cy7.5 vs. NanoCy7.5 <sub>10-H</sub>                    |     | 96.33 | 201.6 | ns   | 78.27 | 223.5 | *    | 46.76 | 172.1 | **** |
| NanoCy7.5 <sub>10-∅</sub><br>NanoCy7.5 <sub>10-L</sub> | vs. | 225.6 | 138.7 | ns   | 314   | 149.8 | **   | 138   | 243.4 | ***  |
| NanoCy7.5 <sub>10-∅</sub><br>NanoCy7.5 <sub>10-H</sub> | vs. | 225.6 | 201.6 | ns   | 314   | 223.5 | ns   | 138   | 172.1 | ns   |
| NanoCy7.5 <sub>10-L</sub><br>NanoCy7.5 <sub>10-H</sub> | vs. | 138.7 | 201.6 | ns   | 149.8 | 223.5 | ns   | 243.4 | 172.1 | *    |

| NanoCy7.5 <sub>100</sub>                                 | 4 h   |       |       | 24 h  |       |       | 72 h  |       |       |    |
|----------------------------------------------------------|-------|-------|-------|-------|-------|-------|-------|-------|-------|----|
|                                                          | ȳ1    | ȳ2    | Sig.  | ȳ1    | ȳ2    | Sig.  | ȳ1    | ȳ2    | Sig.  |    |
| Test details                                             |       |       |       |       |       |       |       |       |       |    |
| Tumor                                                    |       |       |       |       |       |       |       |       |       |    |
| Cy7.5 vs. NanoCy7.5 <sub>100-∅</sub>                     | 11.81 | 33.98 | ns    | 13.55 | 18.13 | ns    | 21.88 | 34.84 | ns    |    |
| Cy7.5 vs. NanoCy7.5 <sub>100-L</sub>                     | 11.81 | 63.97 | ns    | 13.55 | 43.79 | ns    | 21.88 | 35.99 | ns    |    |
| Cy7.5 vs. NanoCy7.5 <sub>100-H</sub>                     | 11.81 | 38.04 | ns    | 13.55 | 118.4 | ns    | 21.88 | 34.01 | ns    |    |
| NanoCy7.5 <sub>100-∅</sub><br>NanoCy7.5 <sub>100-L</sub> | vs.   | 33.98 | 63.97 | ns    | 18.13 | 43.79 | ns    | 34.84 | 35.99 | ns |
| NanoCy7.5 <sub>100-∅</sub><br>NanoCy7.5 <sub>100-H</sub> | vs.   | 33.98 | 38.04 | ns    | 18.13 | 118.4 | ns    | 34.84 | 34.01 | ns |
| NanoCy7.5 <sub>100-L</sub><br>NanoCy7.5 <sub>100-H</sub> | vs.   | 63.97 | 38.04 | ns    | 43.79 | 118.4 | ns    | 35.99 | 34.01 | ns |
| Muscle                                                   |       |       |       |       |       |       |       |       |       |    |
| Cy7.5 vs. NanoCy7.5 <sub>100-∅</sub>                     | 23.8  | 19.3  | ns    | 12.18 | 7.648 | ns    | 18.89 | 10    | ns    |    |

|                                                           |       |       |    |       |       |    |       |       |      |
|-----------------------------------------------------------|-------|-------|----|-------|-------|----|-------|-------|------|
| Cy7.5 vs. NanoCy7.5 <sub>100-L</sub>                      | 23.8  | 22.61 | ns | 12.18 | 25.94 | ns | 18.89 | 11.87 | ns   |
| Cy7.5 vs. NanoCy7.5 <sub>100-H</sub>                      | 23.8  | 35.04 | ns | 12.18 | 16.45 | ns | 18.89 | 9.885 | ns   |
| NanoCy7.5 <sub>100-∅</sub> vs. NanoCy7.5 <sub>100-L</sub> | 19.3  | 22.61 | ns | 7.648 | 25.94 | ns | 10    | 11.87 | ns   |
| NanoCy7.5 <sub>100-∅</sub> vs. NanoCy7.5 <sub>100-H</sub> | 19.3  | 35.04 | ns | 7.648 | 16.45 | ns | 10    | 9.885 | ns   |
| NanoCy7.5 <sub>100-L</sub> vs. NanoCy7.5 <sub>100-H</sub> | 22.61 | 35.04 | ns | 25.94 | 16.45 | ns | 11.87 | 9.885 | ns   |
|                                                           |       |       |    |       |       |    |       |       |      |
| <b>Lung</b>                                               |       |       |    |       |       |    |       |       |      |
| Cy7.5 vs. NanoCy7.5 <sub>100-∅</sub>                      | 112.6 | 156.8 | ns | 67.21 | 27.88 | ns | 68.06 | 36.18 | ns   |
| Cy7.5 vs. NanoCy7.5 <sub>100-L</sub>                      | 112.6 | 231.6 | ns | 67.21 | 75    | ns | 68.06 | 67.72 | ns   |
| Cy7.5 vs. NanoCy7.5 <sub>100-H</sub>                      | 112.6 | 233.3 | ns | 67.21 | 84.62 | ns | 68.06 | 47.64 | ns   |
| NanoCy7.5 <sub>100-∅</sub> vs. NanoCy7.5 <sub>100-L</sub> | 156.8 | 231.6 | ns | 27.88 | 75    | ns | 36.18 | 67.72 | ns   |
| NanoCy7.5 <sub>100-∅</sub> vs. NanoCy7.5 <sub>100-H</sub> | 156.8 | 233.3 | ns | 27.88 | 84.62 | ns | 36.18 | 47.64 | ns   |
| NanoCy7.5 <sub>100-L</sub> vs. NanoCy7.5 <sub>100-H</sub> | 231.6 | 233.3 | ns | 75    | 84.62 | ns | 67.72 | 47.64 | ns   |
|                                                           |       |       |    |       |       |    |       |       |      |
| <b>Heart</b>                                              |       |       |    |       |       |    |       |       |      |
| Cy7.5 vs. NanoCy7.5 <sub>100-∅</sub>                      | 82.04 | 79.42 | ns | 47.51 | 13.88 | ns | 49.6  | 22.84 | ns   |
| Cy7.5 vs. NanoCy7.5 <sub>100-L</sub>                      | 82.04 | 138.9 | ns | 47.51 | 56.86 | ns | 49.6  | 40.88 | ns   |
| Cy7.5 vs. NanoCy7.5 <sub>100-H</sub>                      | 82.04 | 154.1 | ns | 47.51 | 51.25 | ns | 49.6  | 28.33 | ns   |
| NanoCy7.5 <sub>100-∅</sub> vs. NanoCy7.5 <sub>100-L</sub> | 79.42 | 138.9 | ns | 13.88 | 56.86 | ns | 22.84 | 40.88 | ns   |
| NanoCy7.5 <sub>100-∅</sub> vs. NanoCy7.5 <sub>100-H</sub> | 79.42 | 154.1 | ns | 13.88 | 51.25 | ns | 22.84 | 28.33 | ns   |
| NanoCy7.5 <sub>100-L</sub> vs. NanoCy7.5 <sub>100-H</sub> | 138.9 | 154.1 | ns | 56.86 | 51.25 | ns | 40.88 | 28.33 | ns   |
|                                                           |       |       |    |       |       |    |       |       |      |
| <b>Bone</b>                                               |       |       |    |       |       |    |       |       |      |
| Cy7.5 vs. NanoCy7.5 <sub>100-∅</sub>                      | 67.04 | 156.3 | ns | 44.86 | 141.7 | ns | 37.62 | 165.4 | **** |
| Cy7.5 vs. NanoCy7.5 <sub>100-L</sub>                      | 67.04 | 149.2 | ns | 44.86 | 205.6 | ns | 37.62 | 140.2 | **** |
| Cy7.5 vs. NanoCy7.5 <sub>100-H</sub>                      | 67.04 | 148.2 | ns | 44.86 | 221.8 | ns | 37.62 | 144.6 | **** |
| NanoCy7.5 <sub>100-∅</sub> vs. NanoCy7.5 <sub>100-L</sub> | 156.3 | 149.2 | ns | 141.7 | 205.6 | ns | 165.4 | 140.2 | ns   |
| NanoCy7.5 <sub>100-∅</sub> vs. NanoCy7.5 <sub>100-H</sub> | 156.3 | 148.2 | ns | 141.7 | 221.8 | ns | 165.4 | 144.6 | ns   |
| NanoCy7.5 <sub>100-L</sub> vs. NanoCy7.5 <sub>100-H</sub> | 149.2 | 148.2 | ns | 205.6 | 221.8 | ns | 140.2 | 144.6 | ns   |
|                                                           |       |       |    |       |       |    |       |       |      |
| <b>Kidney</b>                                             |       |       |    |       |       |    |       |       |      |
| Cy7.5 vs. NanoCy7.5 <sub>100-∅</sub>                      | 370   | 253   | ns | 286.5 | 78.22 | ns | 361.6 | 144.4 | **** |



|                                                           |       |       |      |       |       |      |       |       |      |
|-----------------------------------------------------------|-------|-------|------|-------|-------|------|-------|-------|------|
| Cy7.5 vs. NanoCy7.5 <sub>100-L</sub>                      | 370   | 374.9 | ns   | 286.5 | 275.5 | ns   | 361.6 | 226.4 | **** |
| Cy7.5 vs. NanoCy7.5 <sub>100-H</sub>                      | 370   | 313.8 | ns   | 286.5 | 193.4 | ns   | 361.6 | 194.9 | **** |
| NanoCy7.5 <sub>100-∅</sub> vs. NanoCy7.5 <sub>100-L</sub> | 253   | 374.9 | ns   | 78.22 | 275.5 | ns   | 144.4 | 226.4 | ***  |
| NanoCy7.5 <sub>100-∅</sub> vs. NanoCy7.5 <sub>100-H</sub> | 253   | 313.8 | ns   | 78.22 | 193.4 | ns   | 144.4 | 194.9 | ns   |
| NanoCy7.5 <sub>100-L</sub> vs. NanoCy7.5 <sub>100-H</sub> | 374.9 | 313.8 | ns   | 275.5 | 193.4 | ns   | 226.4 | 194.9 | ns   |
|                                                           |       |       |      |       |       |      |       |       |      |
| Pancreas                                                  |       |       |      |       |       |      |       |       |      |
| Cy7.5 vs. NanoCy7.5 <sub>100-∅</sub>                      | 59.98 | 75.62 | ns   | 45.04 | 23.05 | ns   | 68.86 | 41.94 | ns   |
| Cy7.5 vs. NanoCy7.5 <sub>100-L</sub>                      | 59.98 | 116.4 | ns   | 45.04 | 65.66 | ns   | 68.86 | 77.27 | ns   |
| Cy7.5 vs. NanoCy7.5 <sub>100-H</sub>                      | 59.98 | 149.5 | ns   | 45.04 | 48.84 | ns   | 68.86 | 65.6  | ns   |
| NanoCy7.5 <sub>100-∅</sub> vs. NanoCy7.5 <sub>100-L</sub> | 75.62 | 116.4 | ns   | 23.05 | 65.66 | ns   | 41.94 | 77.27 | ns   |
| NanoCy7.5 <sub>100-∅</sub> vs. NanoCy7.5 <sub>100-H</sub> | 75.62 | 149.5 | ns   | 23.05 | 48.84 | ns   | 41.94 | 65.6  | ns   |
| NanoCy7.5 <sub>100-L</sub> vs. NanoCy7.5 <sub>100-H</sub> | 116.4 | 149.5 | ns   | 65.66 | 48.84 | ns   | 77.27 | 65.6  | ns   |
|                                                           |       |       |      |       |       |      |       |       |      |
| Liver                                                     |       |       |      |       |       |      |       |       |      |
| Cy7.5 vs. NanoCy7.5 <sub>100-∅</sub>                      | 1432  | 1348  | ns   | 834.6 | 681.1 | ns   | 474.5 | 858   | **** |
| Cy7.5 vs. NanoCy7.5 <sub>100-L</sub>                      | 1432  | 1288  | ns   | 834.6 | 1773  | **** | 474.5 | 1205  | **** |
| Cy7.5 vs. NanoCy7.5 <sub>100-H</sub>                      | 1432  | 1232  | *    | 834.6 | 1079  | *    | 474.5 | 1041  | **** |
| NanoCy7.5 <sub>100-∅</sub> vs. NanoCy7.5 <sub>100-L</sub> | 1348  | 1288  | ns   | 681.1 | 1773  | **** | 858   | 1205  | **** |
| NanoCy7.5 <sub>100-∅</sub> vs. NanoCy7.5 <sub>100-H</sub> | 1348  | 1232  | ns   | 681.1 | 1079  | ***  | 858   | 1041  | **** |
| NanoCy7.5 <sub>100-L</sub> vs. NanoCy7.5 <sub>100-H</sub> | 1288  | 1232  | ns   | 1773  | 1079  | **** | 1205  | 1041  | **** |
|                                                           |       |       |      |       |       |      |       |       |      |
| Spleen                                                    |       |       |      |       |       |      |       |       |      |
| Cy7.5 vs. NanoCy7.5 <sub>100-∅</sub>                      | 96.33 | 603.3 | **** | 78.27 | 316.7 | *    | 46.76 | 263.4 | **** |
| Cy7.5 vs. NanoCy7.5 <sub>100-L</sub>                      | 96.33 | 594.7 | **** | 78.27 | 703.9 | **** | 46.76 | 423.8 | **** |
| Cy7.5 vs. NanoCy7.5 <sub>100-H</sub>                      | 96.33 | 795.2 | **** | 78.27 | 641.8 | **** | 46.76 | 247.6 | **** |
| NanoCy7.5 <sub>100-∅</sub> vs. NanoCy7.5 <sub>100-L</sub> | 603.3 | 594.7 | ns   | 316.7 | 703.9 | ***  | 263.4 | 423.8 | **** |
| NanoCy7.5 <sub>100-∅</sub> vs. NanoCy7.5 <sub>100-H</sub> | 603.3 | 795.2 | ns   | 316.7 | 641.8 | **   | 263.4 | 247.6 | ns   |
| NanoCy7.5 <sub>100-L</sub> vs. NanoCy7.5 <sub>100-H</sub> | 594.7 | 795.2 | *    | 703.9 | 641.8 | ns   | 423.8 | 247.6 | **** |

**Supplemental Table 2.** Values and significance levels for organ SNR in BALB/c mice for lead NP formulations at 4 and 24 h.

| NanoICG | 4 h | 24 h |
|---------|-----|------|
|---------|-----|------|

|          | ICG   | NanoICG | Sig. | ICG   | NanoICG | Sig. |
|----------|-------|---------|------|-------|---------|------|
| Tumor    | 53.68 | 46.46   | ns   | 13.4  | 29.19   | **** |
| Muscle   | 5.144 | 6.447   | ns   | 1.179 | 2.133   | ns   |
| Lung     | 29.05 | 27.42   | ns   | 5.668 | 8.295   | ns   |
| Heart    | 10.57 | 10.7    | ns   | 2.067 | 4.261   | ns   |
| Bone     | 12.68 | 17.62   | ns   | 4.811 | 8.248   | ns   |
| Pancreas | 24.91 | 48.86   | ns   | 3.239 | 6.255   | ns   |
| Kidney   | 108.3 | 55.95   | ***  | 20.48 | 26.28   | **   |
| Liver    | 142.5 | 90.04   | ***  | 19.08 | 30.87   | **** |
| Spleen   | 12.07 | 23.83   | ns   | 4.688 | 12.39   | **** |

| NanoCy7.5 | 4 h   |                            |      | 24 h  |                            |      |
|-----------|-------|----------------------------|------|-------|----------------------------|------|
|           | Cy7.5 | NanoCy7.5 <sub>100-H</sub> | Sig. | Cy7.5 | NanoCy7.5 <sub>100-H</sub> | Sig. |
| Tumor     | 47.77 | 231.3                      | ***  | 29.02 | 270.3                      | **** |
| Muscle    | 26.72 | 43.52                      | ns   | 12.5  | 24.58                      | ns   |
| Lung      | 256.2 | 378.8                      | ns   | 73.86 | 100.8                      | ns   |
| Heart     | 74.34 | 164.5                      | ns   | 28.41 | 42.58                      | ns   |
| Bone      | 67.33 | 116.1                      | ns   | 34.02 | 102.6                      | *    |
| Pancreas  | 65.48 | 150.3                      | ns   | 38.6  | 77.58                      | ns   |
| Kidney    | 283.6 | 361.4                      | ns   | 180.6 | 170.9                      | ns   |
| Liver     | 1017  | 937.5                      | ns   | 467.8 | 744.3                      | **** |
| Spleen    | 329.1 | 347                        | ns   | 139.4 | 404.5                      | **** |
